# Supplementary material
Source: publisher figshare collection journal article supplement (https://acs.figshare.com/ndownloader/files/5112496)

# **Reaction of Hydroxyfullerene with Metal Salts: A Route to Remediation and Immobilization**

Robin Anderson and Andrew R. Barron\*

*Department of Chemistry and Center for Nanoscale Science and Technology,  
Rice University, Houston, Texas 77005, USA*

Supplementary Materials

**Figure S1.** Representative SEM image of Fe-cross linked fullerenol agglomerates formed from the reaction of  $\text{Fe}(\text{NO}_3)_3$  and  $\text{C}_{60}(\text{OH})_n$  in aqueous solution.

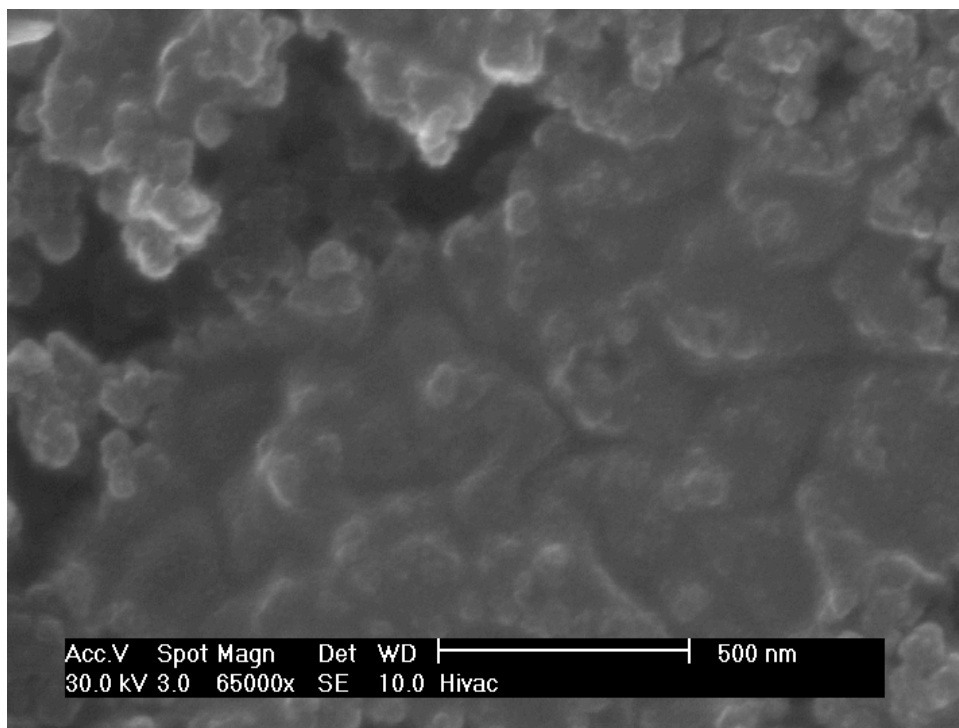

**Figure S2.** Representative TEM image of Fe-cross linked fulleranol agglomerates formed from the reaction of  $\text{Fe}(\text{NO}_3)_3$  and  $\text{C}_{60}(\text{OH})_n$  in aqueous solution.

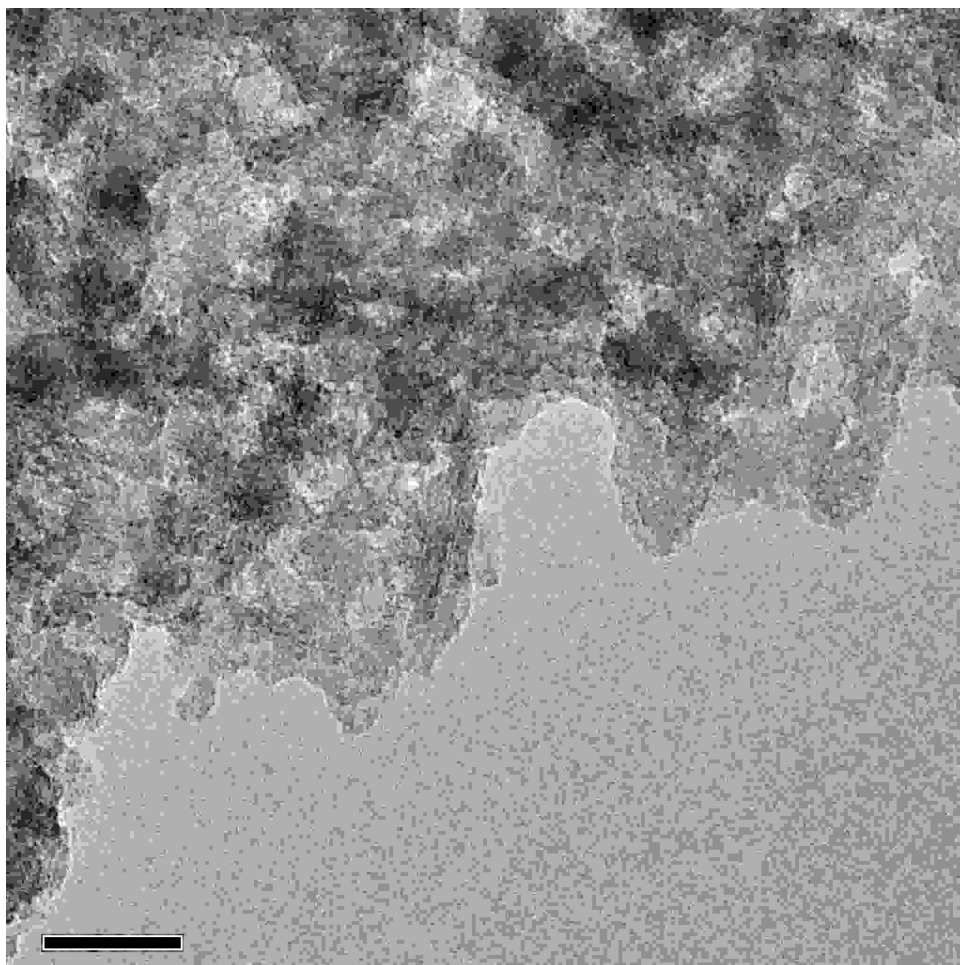

**Figure S3.** UV-visible spectra of (a)  $\text{Fe}(\text{NO}_3)_3$  (50 mM) in water, (b)  $\text{C}_{60}(\text{OH})_n$  (50 mM) in water, and (c) soluble fraction after reaction between  $\text{Fe}(\text{NO}_3)_3$  and  $\text{C}_{60}(\text{OH})_n$  in water.

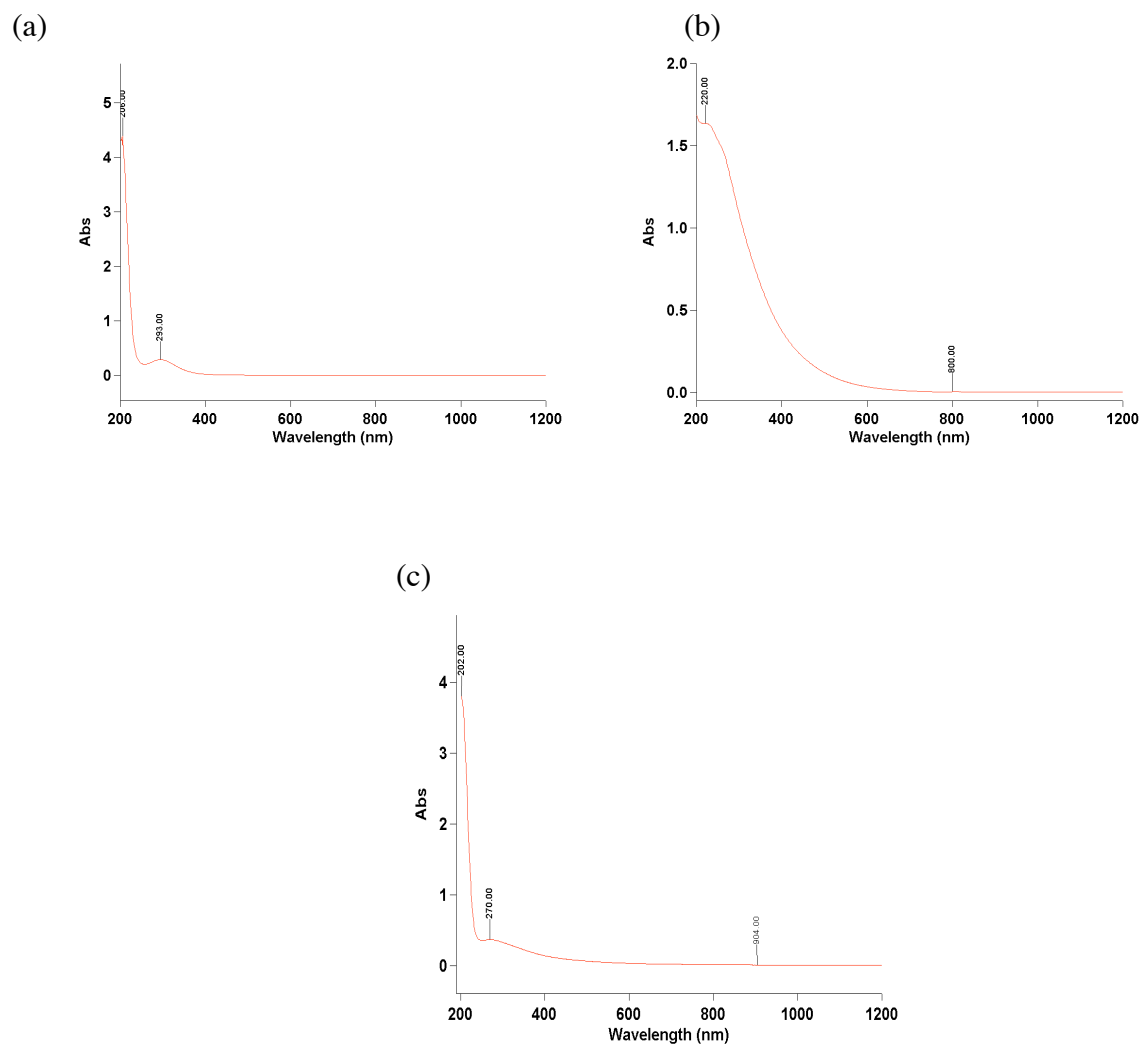

**Figure S4.** The C 1s (a) and Fe 2p (b) X-ray photoelectron spectral components of fullerenol (blue line) and the product from the reaction of  $\text{Fe}(\text{NO}_3)_3$  and  $\text{C}_{60}(\text{OH})_n$  (red line).

(a)

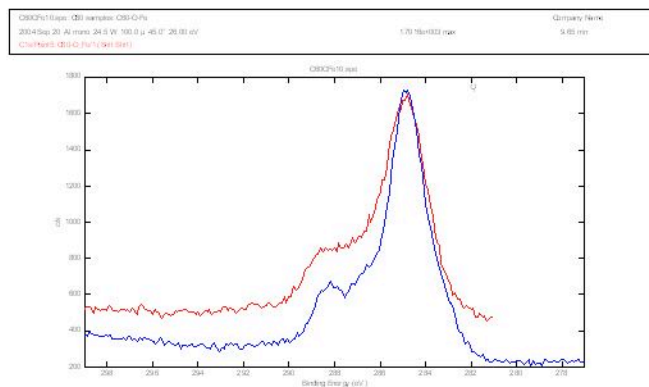

(b)

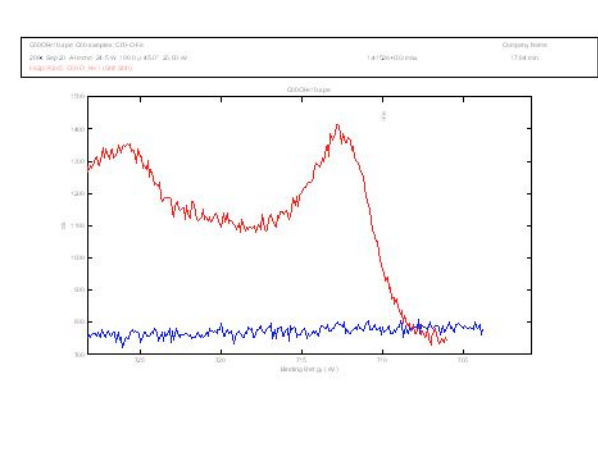

**Figure S5.** Computer generated structures of  $[\text{Fe}(\text{C}_{60}\text{O}_2)_2]$  unit, showing the steric accessibility of the cross-linked unit. Atoms are color coded as follows: carbon (grey), oxygen (red), and iron (green).

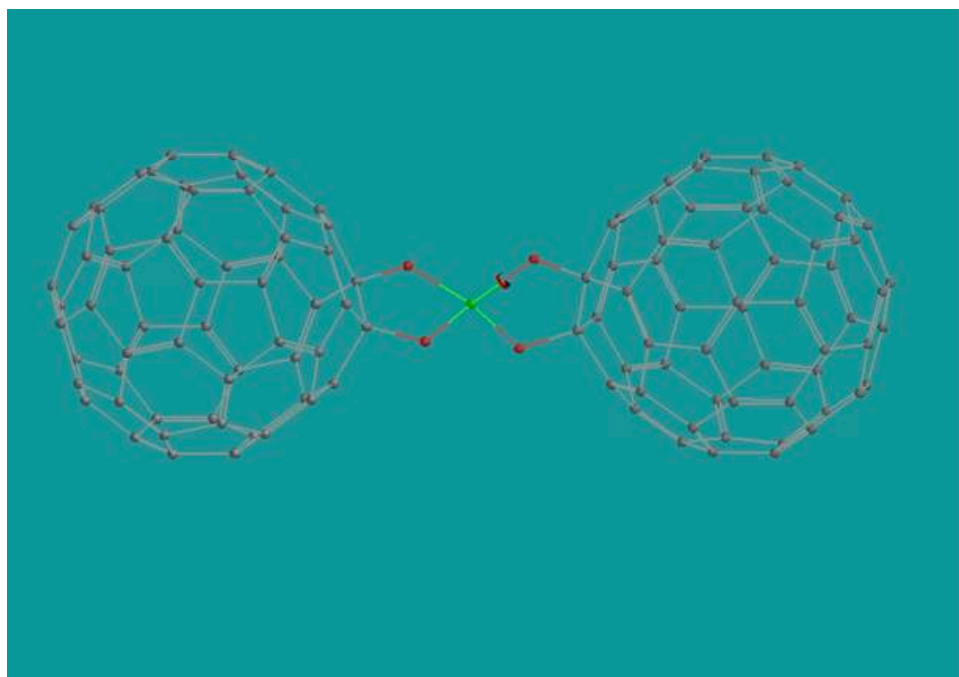

**Figure S6.** Computer generated structures of  $[\text{Fe}(\text{C}_{60}\text{O}_2)_3]$  unit, showing the steric accessibility of the cross-linked unit. Atoms are color coded as follows: carbon (grey), oxygen (red), and iron (green).

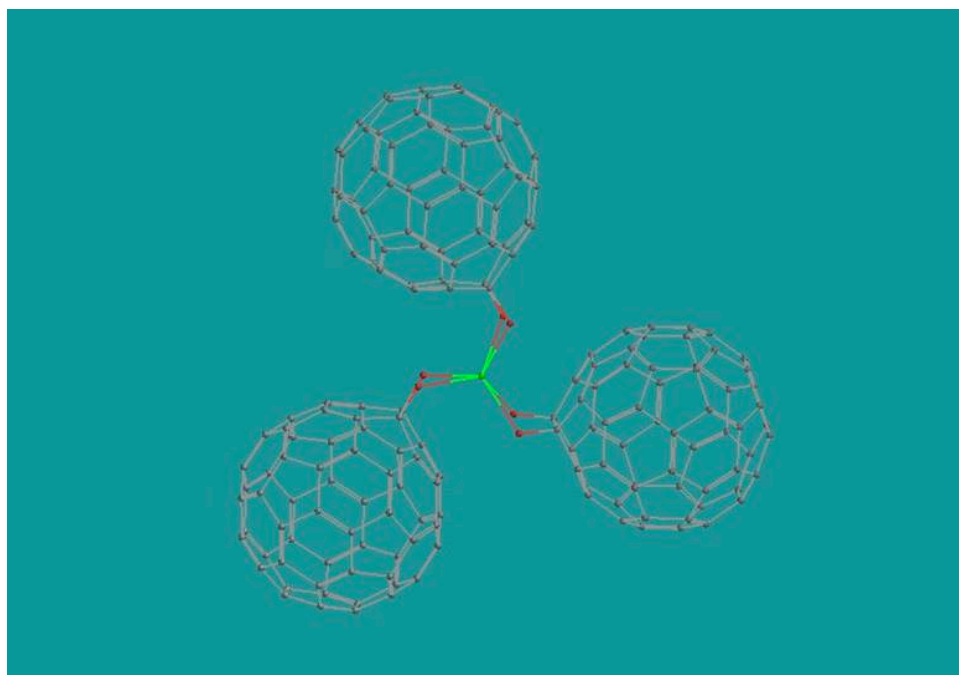

**Figure S7.** AFM image of Fe-fullerenol showing the particulate nature of the aggregates.

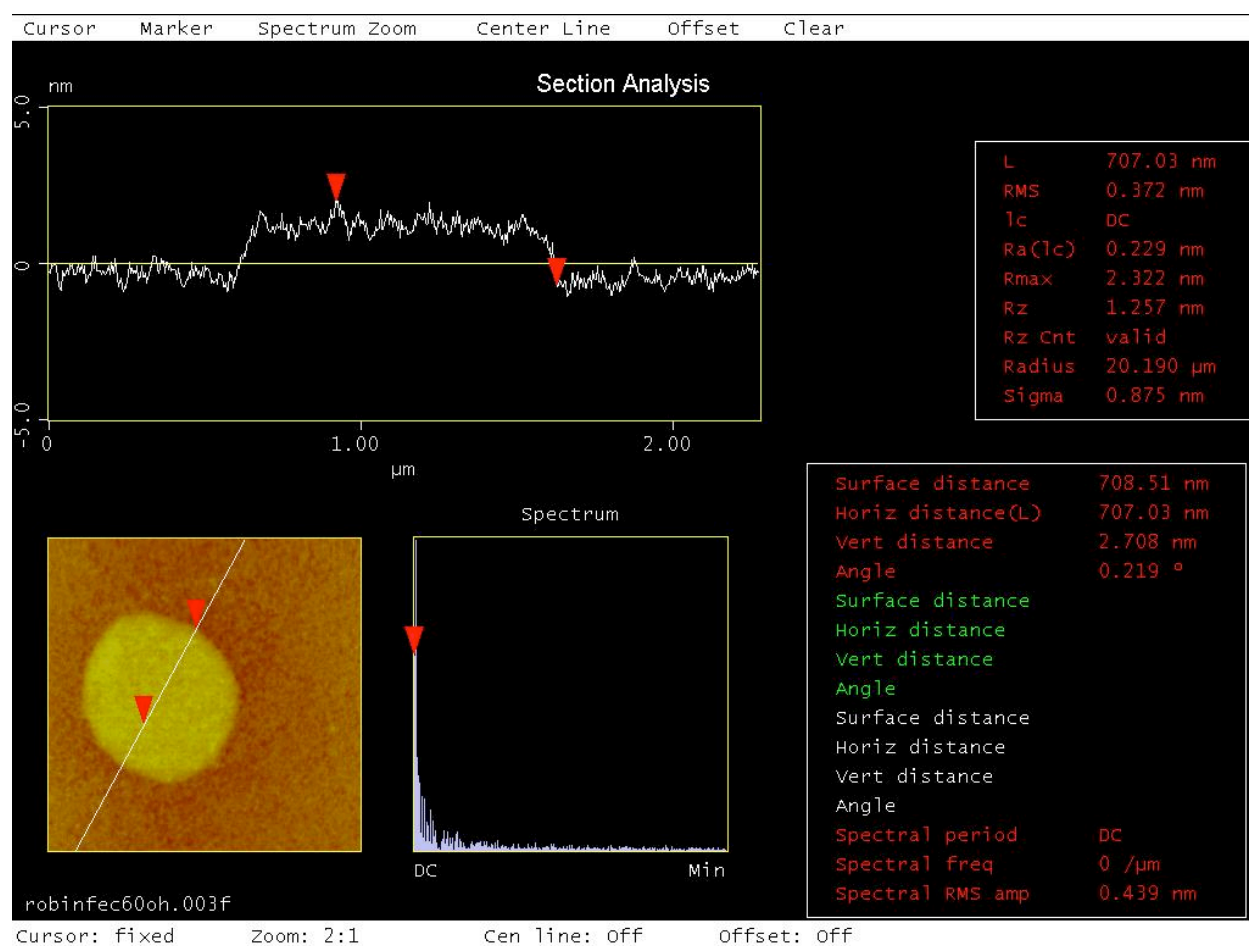

Supplement: Supplementary file 1 [file 5112496]
